# Supplementary material for: Combination of a SnO2–C hybrid anode and a tubular mesoporous carbon cathode in a high energy density non-aqueous lithium ion capacitor: preparation and characterisation
Source: Royal Society of Chemistry journal article supplement (doi:10.1039/c4ta00670d), 2014-01-01
Supplement: c4ta00670d1.pdf [file c4ta00670d1.pdf]

# Combination of a $\text{SnO}_2$ -C hybrid anode and a tubular mesoporous carbon cathode in a high energy density non-aqueous lithium ion capacitor: preparation and characterisation

Wen-Hui Qu, Fei Han, An-Hui Lu, Chao Xing, Mo Qiao, Wen-Cui Li\*

*State Key Laboratory of Fine Chemicals, School of Chemical Engineering, Dalian University of Technology, Dalian 116024, P. R. China*

E-mail: wencuili@dlut.edu.cn, Fax: (+86)-411-84986355

## Supporting Information

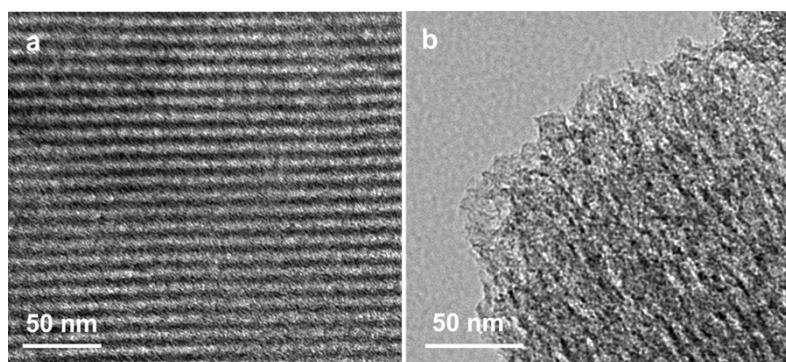

**Fig. S1** TEM images of (a) TMC and (b) HPC.

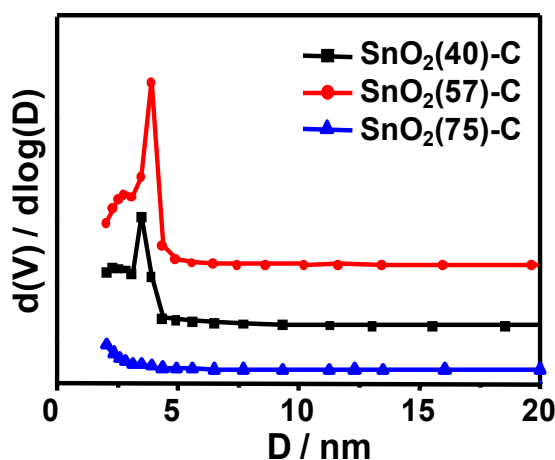

**Fig. S2** Pore size distribution curves of the as-prepared  $\text{SnO}_2$ -C hybrids.

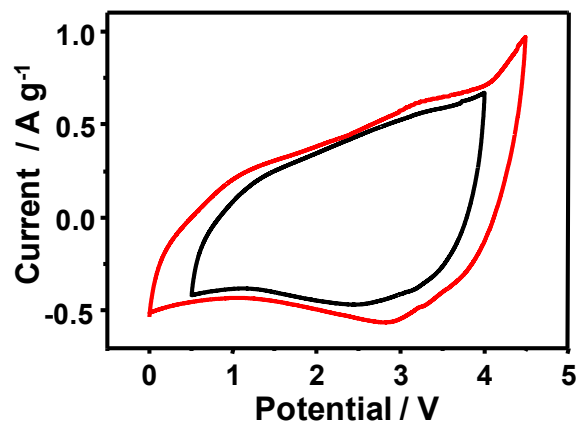

**Fig. S3** CV curves of C//SnO<sub>2</sub>-C in range of 0–4.5 V and 0.5–4 V at a scan rate of 10 mV s<sup>-1</sup>.

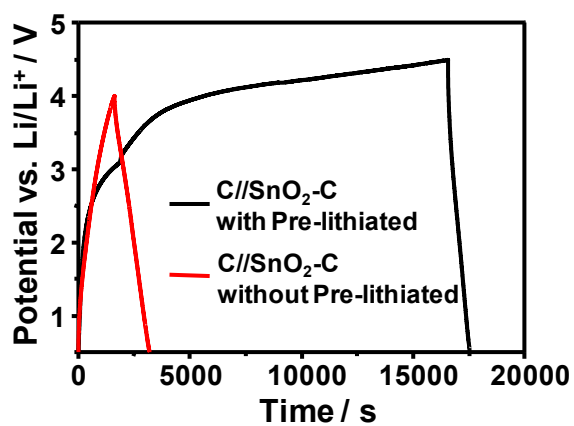

**Fig. S4** Initial charge-discharge curves of C//SnO<sub>2</sub>-C with and without pre-lithiated treatment.

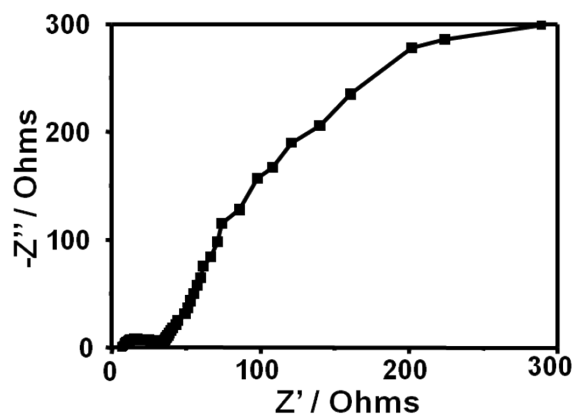

**Fig. S5** The Nyquist plot of SnO<sub>2</sub>(75)-C half-cell.
